# Supplementary material for: Effects of rhamnolipids on the cell surface characteristics of Sphingomonas sp. GY2B and the biodegradation of phenanthrene
Source: Royal Society of Chemistry journal article supplement (doi:10.1039/c7ra02576a), 2017-01-01
Supplement: c7ra02576a1.pdf [file c7ra02576a1.pdf]

**Table** FTIR absorption bands and the possible functional groups of *Sphingomonas* sp. GY2B after treatment with rhamnolipids for 24h and 48 h

| Wavenumber (cm <sup>-1</sup> ) | Assignment                                                       | Functional groups                                                                       | Main corresponding cellular compounds           |
|--------------------------------|------------------------------------------------------------------|-----------------------------------------------------------------------------------------|-------------------------------------------------|
| 3500-3000                      | Hydroxyl(-OH)                                                    |                                                                                         |                                                 |
| 2450-2300                      | C-H                                                              | Fatty chains                                                                            | Cellular membranes                              |
| 1750-1720                      | $\nu$ C=O                                                        | Esters from lipids or fatty acids, Carboxylic groups                                    | Cellular membranes                              |
| 1658-1650                      | Amide I ( $\nu$ C=O coupled with $\delta$ N-H)                   | Proteins                                                                                | Membranes, cytoplasm, flagella, pili, ribosomes |
| 1567-1540                      | Amide II ( $\delta$ N-H coupled with $\nu$ C-N)                  |                                                                                         |                                                 |
| 1455-1452                      | $\delta$ CH <sub>2</sub> , $\delta$ <sub>a</sub> CH <sub>3</sub> | Lipids                                                                                  | Cellular membranes                              |
| 1396-1392                      | $\nu$ <sub>s</sub> COO <sup>-</sup>                              | Amino acids, fatty acid chains                                                          | Capsule, peptidoglycan                          |
| 1270-1250                      | $\nu$ <sub>a</sub> PO <sub>2</sub> <sup>-</sup>                  | DNA, RNA                                                                                | Nucleoid, ribosomes                             |
| 1200-900                       | N C-O, $\nu$ C-C, $\delta$ C-O-C and $\nu$ <sub>s</sub> C-O-P    | Polysaccharide(lipopolysaccharides and peptidoglycan)<br>Phosphodiester, phospholipids, | Capsule, storage, inclusions                    |
| 1099-1090                      | $\nu$ <sub>s</sub> PO <sub>2</sub> <sup>-</sup>                  | phosphorylated proteins or polyphosphate products LPS, nucleic acids                    | Cellular membranes, Nucleoid, ribosomes         |
| 983-860                        | $\nu$ <sub>as</sub> O-P-O                                        | Phosphoryl groups                                                                       | Cellular membranes                              |
